# Supplementary material for: Removal of Brilliant Green Dye from Water Using Ficus benghalensis Tree Leaves as an Efficient Biosorbent
Source: MDPI journal article supplement (doi:10.3390/ma16020521), 2023-01-05
Supplement: s1 [file s1]

Supplementary Information

# Removal of Brilliant Green Dye from Water Using *Ficus benghalensis* Tree Leaves as an Efficient Biosorbent

Salma Gul <sup>1,\*</sup>, Azra Gul <sup>1</sup>, Hajera Gul <sup>2</sup>, Rozina Khattak <sup>2,\*</sup>, Muhammad Ismail <sup>1</sup>, Sana Ullah Khan <sup>1</sup>, Muhammad Sufaid Khan <sup>3</sup>, Hani Amir Aouissi <sup>4,5,6</sup> and Andrejs Krauklis <sup>7</sup>

<sup>1</sup> Department of Chemistry, Women University Swabi, Swabi 22101, Pakistan

<sup>2</sup> Department of Chemistry, Shaheed Benazir Bhutto Women University; Peshawar 25000, Pakistan

<sup>3</sup> Department of Chemistry, University of Malakand, Chakdara 18800, Pakistan

<sup>4</sup> Scientific and Technical Research Center on Arid Regions (CRSTRA), Biskra 07000, Algeria

<sup>5</sup> Laboratoire de Recherche et d'Etude en Aménagement et Urbanisme (LREAU), Université des Sciences et de la Technologie (USTHB), Algiers 16000, Algeria

<sup>6</sup> Environmental Research Center (CRE), Badji-Mokhtar Annaba University, Annaba 23000, Algeria

<sup>7</sup> Institute for Mechanics of Materials, University of Latvia, Jelgavas Street 3, LV-1004 Riga, Latvia

\* Correspondence: salma@wus.edu.pk (S.G.); rznkhattak@sbbwu.edu.pk (R.K.)

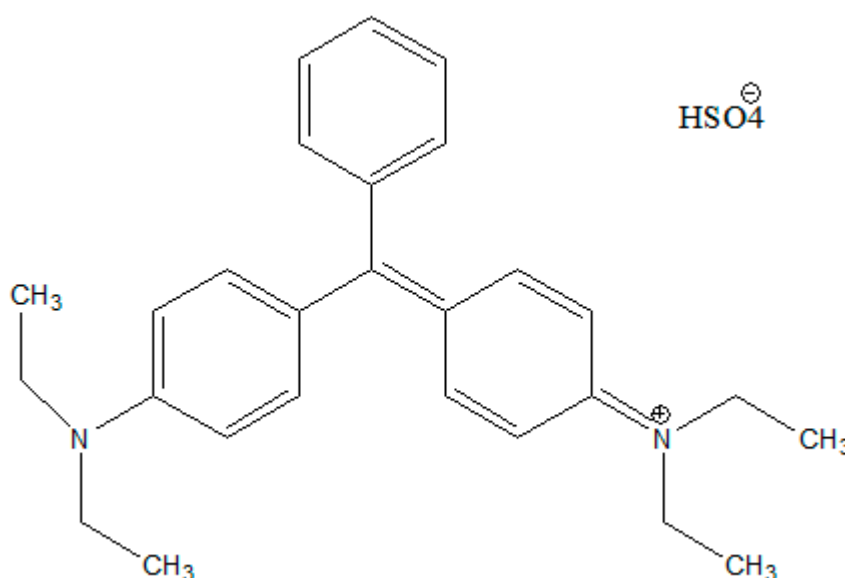

**Figure S1.** Structural formula of brilliant green dye.

**Citation:** Gul, S.; Gul, A.; Gul, H.; Khattak, R.; Ismail, M.; Khan, S.U.; Khan, M.S.; Aouissi, H.A.; Krauklis, A. Removal of Brilliant Green Dye from Water Using *Ficus benghalensis* Tree Leaves as an Efficient Biosorbent. *Materials* **2023**, *16*, 521. <https://doi.org/10.3390/ma16020521>

Academic Editors: Carlos Manuel Silva, Barbara Gawdzik, Eduarda Pereira and Cláudia B. Lopes

Received: 22 October 2022

Revised: 30 November 2022

Accepted: 28 December 2022

Published: 5 January 2023

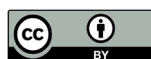

**Copyright:** © 2023 by the authors. Licensee MDPI, Basel, Switzerland. This article is an open access article distributed under the terms and conditions of the Creative Commons Attribution (CC BY) license (<https://creativecommons.org/licenses/by/4.0/>).
